# Supplementary material for: Gene co-expression network analysis of Trypanosoma brucei in tsetse fly vector
Source: PubMed Central journal article supplement (PMC7821691; doi:10.1186/s13071-021-04597-6), 2021-01-22
Supplement: 13071_2021_4597_MOESM7_ESM.pdf [file 13071_2021_4597_MOESM7_ESM.pdf]

### Table S3: Module GO Enrichment

**a) Lightyellow enrichment (129 genes)**

**Over-represented GO terms:**

| category   | num_in_subset | num_total | adj_pval  | term                                            | ontology |
|------------|---------------|-----------|-----------|-------------------------------------------------|----------|
| GO:0003735 | 27            | 161       | 0.0000000 | structural constituent of ribosome              | MF       |
| GO:0005198 | 27            | 190       | 0.0000000 | structural molecule activity                    | MF       |
| GO:0005840 | 30            | 260       | 0.0000000 | ribosome                                        | CC       |
| GO:0006412 | 28            | 243       | 0.0000000 | translation                                     | BP       |
| GO:0043043 | 28            | 245       | 0.0000000 | peptide biosynthetic process                    | BP       |
| GO:0006518 | 28            | 252       | 0.0000000 | peptide metabolic process                       | BP       |
| GO:0043604 | 28            | 259       | 0.0000000 | amide biosynthetic process                      | BP       |
| GO:0043603 | 28            | 268       | 0.0000000 | cellular amide metabolic process                | BP       |
| GO:0009058 | 40            | 673       | 0.0000001 | biosynthetic process                            | BP       |
| GO:1901566 | 31            | 381       | 0.0000001 | organonitrogen compound biosynthetic process    | BP       |
| GO:0044249 | 38            | 648       | 0.0000005 | cellular biosynthetic process                   | BP       |
| GO:0044271 | 32            | 476       | 0.0000010 | cellular nitrogen compound biosynthetic process | BP       |
| GO:1901576 | 37            | 651       | 0.0000015 | organic substance biosynthetic process          | BP       |
| GO:0034645 | 30            | 433       | 0.0000034 | cellular macromolecule biosynthetic process     | BP       |
| GO:0009059 | 30            | 438       | 0.0000038 | macromolecule biosynthetic process              | BP       |
| GO:0044391 | 15            | 142       | 0.0002226 | ribosomal subunit                               | CC       |
| GO:1990904 | 16            | 192       | 0.0016499 | ribonucleoprotein complex                       | CC       |
| GO:0034641 | 39            | 963       | 0.0018397 | cellular nitrogen compound metabolic process    | BP       |
| GO:1901564 | 37            | 903       | 0.0018414 | organonitrogen compound metabolic process       | BP       |

|            |    |      |           |                                                |    |
|------------|----|------|-----------|------------------------------------------------|----|
| GO:0015934 | 10 | 82   | 0.0041045 | large ribosomal subunit                        | CC |
| GO:0044237 | 52 | 1593 | 0.0045776 | cellular metabolic process                     | BP |
| GO:0019538 | 31 | 763  | 0.0119541 | protein metabolic process                      | BP |
| GO:0044267 | 29 | 673  | 0.0122762 | cellular protein metabolic process             | BP |
| GO:0006091 | 7  | 60   | 0.0207513 | generation of precursor metabolites and energy | BP |
| GO:0010467 | 35 | 891  | 0.0207513 | gene expression                                | BP |
| GO:0019843 | 4  | 11   | 0.0207513 | rRNA binding                                   | MF |
| GO:0008152 | 61 | 2137 | 0.0226994 | metabolic process                              | BP |
| GO:0044238 | 48 | 1594 | 0.0462493 | primary metabolic process                      | BP |

## b) Magenta enrichment (264 genes)

### Over-represented GO terms:

| category   | num_in_subset | num_total | adj_pval  | term                                                       | ontology |
|------------|---------------|-----------|-----------|------------------------------------------------------------|----------|
| GO:0005856 | 54            | 693       | 0.0004069 | cytoskeleton                                               | CC       |
| GO:0005930 | 31            | 293       | 0.0004069 | axoneme                                                    | CC       |
| GO:0005929 | 89            | 1558      | 0.0023548 | cilium                                                     | CC       |
| GO:0042995 | 89            | 1558      | 0.0023548 | cell projection                                            | CC       |
| GO:0120025 | 89            | 1558      | 0.0023548 | plasma membrane bounded cell projection                    | CC       |
| GO:0004054 | 3             | 3         | 0.0265477 | arginine kinase activity                                   | MF       |
| GO:0016775 | 3             | 3         | 0.0265477 | phosphotransferase activity, nitrogenous group as acceptor | MF       |
| GO:0043228 | 72            | 1305      | 0.0265477 | non-membrane-bounded organelle                             | CC       |
| GO:0043232 | 72            | 1305      | 0.0265477 | intracellular non-membrane-bounded organelle               | CC       |

**c) Greenyellow enrichment (251 genes)**

**Over-represented GO terms:**

| category   | num_in_subset | num_total | adj_pval  | term                                         | ontology |
|------------|---------------|-----------|-----------|----------------------------------------------|----------|
| GO:0005856 | 57            | 693       | 0.0012162 | cytoskeleton                                 | CC       |
| GO:0006928 | 21            | 125       | 0.0025244 | movement of cell or subcellular component    | BP       |
| GO:0015630 | 35            | 344       | 0.0025244 | microtubule cytoskeleton                     | CC       |
| GO:0043228 | 75            | 1305      | 0.0025244 | non-membrane-bounded organelle               | CC       |
| GO:0043232 | 75            | 1305      | 0.0025244 | intracellular non-membrane-bounded organelle | CC       |
| GO:0071103 | 7             | 22        | 0.0224329 | DNA conformation change                      | BP       |
| GO:0003774 | 15            | 77        | 0.0253184 | motor activity                               | MF       |
| GO:0003777 | 14            | 72        | 0.0378001 | microtubule motor activity                   | MF       |
| GO:0005875 | 14            | 82        | 0.0378001 | microtubule associated complex               | CC       |

**d) Black enrichment (438 genes)**

**Over-represented GO terms:**

| category   | num_in_subset | num_total | adj_pval  | term                                            | ontology |
|------------|---------------|-----------|-----------|-------------------------------------------------|----------|
| GO:0044271 | 68            | 476       | 0.0000002 | cellular nitrogen compound biosynthetic process | BP       |
| GO:0016020 | 92            | 812       | 0.0000004 | membrane                                        | CC       |
| GO:1901576 | 80            | 651       | 0.0000007 | organic substance biosynthetic process          | BP       |
| GO:0009058 | 81            | 673       | 0.0000011 | biosynthetic process                            | BP       |
| GO:0044249 | 78            | 648       | 0.0000020 | cellular biosynthetic process                   | BP       |
| GO:0043043 | 42            | 245       | 0.0000059 | peptide biosynthetic process                    | BP       |
| GO:0043604 | 43            | 259       | 0.0000073 | amide biosynthetic process                      | BP       |

|            |     |      |           |                                              |    |
|------------|-----|------|-----------|----------------------------------------------|----|
| GO:1901566 | 54  | 381  | 0.0000084 | organonitrogen compound biosynthetic process | BP |
| GO:0006412 | 41  | 243  | 0.0000088 | translation                                  | BP |
| GO:0006518 | 42  | 252  | 0.0000088 | peptide metabolic process                    | BP |
| GO:0043603 | 43  | 268  | 0.0000124 | cellular amide metabolic process             | BP |
| GO:0031966 | 34  | 212  | 0.0001033 | mitochondrial membrane                       | CC |
| GO:0005740 | 34  | 216  | 0.0001587 | mitochondrial envelope                       | CC |
| GO:1901564 | 89  | 903  | 0.0002295 | organonitrogen compound metabolic process    | BP |
| GO:0003735 | 30  | 161  | 0.0002896 | structural constituent of ribosome           | MF |
| GO:0016021 | 47  | 394  | 0.0004946 | integral component of membrane               | CC |
| GO:0031224 | 47  | 394  | 0.0004946 | intrinsic component of membrane              | CC |
| GO:0101031 | 6   | 9    | 0.0005169 | chaperone complex                            | CC |
| GO:0019538 | 76  | 763  | 0.0016904 | protein metabolic process                    | BP |
| GO:0004016 | 11  | 43   | 0.0021100 | adenylate cyclase activity                   | MF |
| GO:0009975 | 11  | 43   | 0.0021100 | cyclase activity                             | MF |
| GO:0009187 | 12  | 52   | 0.0022011 | cyclic nucleotide metabolic process          | BP |
| GO:0009190 | 12  | 52   | 0.0022011 | cyclic nucleotide biosynthetic process       | BP |
| GO:0044267 | 69  | 673  | 0.0022011 | cellular protein metabolic process           | BP |
| GO:0044281 | 35  | 280  | 0.0022011 | small molecule metabolic process             | BP |
| GO:0008152 | 168 | 2137 | 0.0022018 | metabolic process                            | BP |
| GO:0016849 | 12  | 53   | 0.0025243 | phosphorus-oxygen lyase activity             | MF |
| GO:0005198 | 30  | 190  | 0.0029241 | structural molecule activity                 | MF |
| GO:0005777 | 24  | 158  | 0.0029241 | peroxisome                                   | CC |
| GO:0042579 | 24  | 158  | 0.0029241 | microbody                                    | CC |
| GO:0005832 | 5   | 8    | 0.0035998 | chaperonin-containing T-complex              | CC |
| GO:0031090 | 38  | 309  | 0.0044287 | organelle membrane                           | CC |
| GO:0020015 | 23  | 154  | 0.0051638 | glycosome                                    | CC |

|            |     |      |           |                                                        |    |
|------------|-----|------|-----------|--------------------------------------------------------|----|
| GO:0044238 | 130 | 1594 | 0.0055108 | primary metabolic process                              | BP |
| GO:0008150 | 216 | 2959 | 0.0057668 | biological_process                                     | BP |
| GO:0055085 | 19  | 118  | 0.0057668 | transmembrane transport                                | BP |
| GO:0034645 | 49  | 433  | 0.0059436 | cellular macromolecule biosynthetic process            | BP |
| GO:0005743 | 20  | 120  | 0.0062621 | mitochondrial inner membrane                           | CC |
| GO:0019866 | 20  | 120  | 0.0062621 | organelle inner membrane                               | CC |
| GO:0044237 | 130 | 1593 | 0.0062621 | cellular metabolic process                             | BP |
| GO:0009059 | 49  | 438  | 0.0069398 | macromolecule biosynthetic process                     | BP |
| GO:0016829 | 15  | 87   | 0.0081098 | lyase activity                                         | MF |
| GO:0055086 | 21  | 145  | 0.0082457 | nucleobase-containing small molecule metabolic process | BP |
| GO:0006807 | 122 | 1491 | 0.0088455 | nitrogen compound metabolic process                    | BP |
| GO:0071704 | 149 | 1919 | 0.0120220 | organic substance metabolic process                    | BP |
| GO:1901293 | 15  | 90   | 0.0120263 | nucleoside phosphate biosynthetic process              | BP |
| GO:0034641 | 86  | 963  | 0.0137447 | cellular nitrogen compound metabolic process           | BP |
| GO:0006753 | 17  | 116  | 0.0251278 | nucleoside phosphate metabolic process                 | BP |
| GO:0009165 | 14  | 86   | 0.0251278 | nucleotide biosynthetic process                        | BP |
| GO:0009987 | 173 | 2338 | 0.0357270 | cellular process                                       | BP |
| GO:0005742 | 4   | 7    | 0.0388542 | mitochondrial outer membrane translocase complex       | CC |
| GO:0098799 | 4   | 7    | 0.0388542 | outer mitochondrial membrane protein complex           | CC |
| GO:0003674 | 233 | 3374 | 0.0405788 | molecular_function                                     | MF |
| GO:0006457 | 16  | 103  | 0.0405788 | protein folding                                        | BP |
| GO:0009117 | 16  | 111  | 0.0407647 | nucleotide metabolic process                           | BP |
| GO:0020022 | 9   | 43   | 0.0459294 | acidocalcisome                                         | CC |
| GO:0051082 | 12  | 68   | 0.0468482 | unfolded protein binding                               | MF |
| GO:0006793 | 42  | 439  | 0.0496207 | phosphorus metabolic process                           | BP |

**Under-represented GO terms:**

| category   | num_in_subset | num_total | adj_pval  | term                     | ontology |
|------------|---------------|-----------|-----------|--------------------------|----------|
| GO:0005856 | 14            | 693       | 0.0006969 | cytoskeleton             | CC       |
| GO:0015630 | 3             | 344       | 0.0019184 | microtubule cytoskeleton | CC       |

**e) Blue enrichment (614 genes)**

**Under-represented GO terms:**

| category   | num_in_subset | num_total | adj_pval  | term                                            | ontology |
|------------|---------------|-----------|-----------|-------------------------------------------------|----------|
| GO:0006412 | 1             | 243       | 0.0000000 | translation                                     | BP       |
| GO:0043043 | 1             | 245       | 0.0000000 | peptide biosynthetic process                    | BP       |
| GO:0043604 | 2             | 259       | 0.0000009 | amide biosynthetic process                      | BP       |
| GO:0006518 | 2             | 252       | 0.0000010 | peptide metabolic process                       | BP       |
| GO:0043603 | 3             | 268       | 0.0000025 | cellular amide metabolic process                | BP       |
| GO:0003735 | 0             | 161       | 0.0000047 | structural constituent of ribosome              | MF       |
| GO:1901566 | 9             | 381       | 0.0000100 | organonitrogen compound biosynthetic process    | BP       |
| GO:0044271 | 14            | 476       | 0.0001263 | cellular nitrogen compound biosynthetic process | BP       |
| GO:1901576 | 27            | 651       | 0.0032823 | organic substance biosynthetic process          | BP       |
| GO:0009058 | 29            | 673       | 0.0042627 | biosynthetic process                            | BP       |
| GO:0034641 | 47            | 963       | 0.0046486 | cellular nitrogen compound metabolic process    | BP       |
| GO:0044249 | 28            | 648       | 0.0052861 | cellular biosynthetic process                   | BP       |
| GO:0009059 | 17            | 438       | 0.0070249 | macromolecule biosynthetic process              | BP       |
| GO:0005730 | 9             | 307       | 0.0075215 | nucleolus                                       | CC       |
| GO:0034645 | 17            | 433       | 0.0075215 | cellular macromolecule biosynthetic process     | BP       |
| GO:0010467 | 47            | 891       | 0.0157773 | gene expression                                 | BP       |
| GO:0003723 | 13            | 392       | 0.0220840 | RNA binding                                     | MF       |
| GO:0005198 | 6             | 190       | 0.0280443 | structural molecule activity                    | MF       |

**f) Green enrichment (528 genes)****Under-represented GO terms:**

| category   | num_in_subset | num_total | adj_pval | term                                         | ontology |
|------------|---------------|-----------|----------|----------------------------------------------|----------|
| GO:0043228 | 56            | 1305      | 0.005741 | non-membrane-bounded organelle               | CC       |
| GO:0043232 | 56            | 1305      | 0.005741 | intracellular non-membrane-bounded organelle | CC       |

**g) Turquoise enrichment (732 genes)****Over-represented GO terms:**

| category   | num_in_subset | num_total | adj_pval  | term                            | ontology |
|------------|---------------|-----------|-----------|---------------------------------|----------|
| GO:0009986 | 15            | 30        | 0.0002845 | cell surface                    | CC       |
| GO:0016020 | 121           | 812       | 0.0002845 | membrane                        | CC       |
| GO:0045121 | 9             | 11        | 0.0002845 | membrane raft                   | CC       |
| GO:0098589 | 9             | 11        | 0.0002845 | membrane region                 | CC       |
| GO:0098857 | 9             | 11        | 0.0002845 | membrane microdomain            | CC       |
| GO:0016021 | 60            | 394       | 0.0169210 | integral component of membrane  | CC       |
| GO:0031224 | 60            | 394       | 0.0169210 | intrinsic component of membrane | CC       |

**Under-represented GO terms:**

| category   | num_in_subset | num_total | adj_pval  | term                                         | ontology |
|------------|---------------|-----------|-----------|----------------------------------------------|----------|
| GO:0043228 | 66            | 1305      | 0.0000000 | non-membrane-bounded organelle               | CC       |
| GO:0043232 | 66            | 1305      | 0.0000000 | intracellular non-membrane-bounded organelle | CC       |
| GO:0005730 | 13            | 307       | 0.0384650 | nucleolus                                    | CC       |
| GO:0003735 | 6             | 161       | 0.0498993 | structural constituent of ribosome           | MF       |
| GO:0005198 | 8             | 190       | 0.0498993 | structural molecule activity                 | MF       |

GO:0009987            179        2338   0.0498993   cellular process                            BP

**h) Purple enrichment (251 genes)**

**Over-represented GO terms:**

| category   | num_in_subset | num_total | adj_pval  | term                                  | ontology |
|------------|---------------|-----------|-----------|---------------------------------------|----------|
| GO:0098798 | 34            | 240       | 0.0000008 | mitochondrial protein complex         | CC       |
| GO:0005840 | 33            | 260       | 0.0001939 | ribosome                              | CC       |
| GO:0000313 | 17            | 120       | 0.0122948 | organellar ribosome                   | CC       |
| GO:0005743 | 17            | 120       | 0.0122948 | mitochondrial inner membrane          | CC       |
| GO:0019866 | 17            | 120       | 0.0122948 | organelle inner membrane              | CC       |
| GO:0005761 | 16            | 114       | 0.0132366 | mitochondrial ribosome                | CC       |
| GO:0003735 | 21            | 161       | 0.0192636 | structural constituent of ribosome    | MF       |
| GO:0005759 | 17            | 136       | 0.0192636 | mitochondrial matrix                  | CC       |
| GO:0005762 | 12            | 70        | 0.0192636 | mitochondrial large ribosomal subunit | CC       |
| GO:0044391 | 18            | 142       | 0.0192636 | ribosomal subunit                     | CC       |
| GO:0000315 | 12            | 72        | 0.0193209 | organellar large ribosomal subunit    | CC       |
| GO:0005739 | 81            | 1359      | 0.0193209 | mitochondrion                         | CC       |
| GO:1990904 | 21            | 192       | 0.0193209 | ribonucleoprotein complex             | CC       |

**i) Darkturquoise enrichment (100 genes)**

**Over-represented GO terms:**

| category   | num_in_subset | num_total | adj_pval  | term                                                            | ontology |
|------------|---------------|-----------|-----------|-----------------------------------------------------------------|----------|
| GO:0016772 | 17            | 329       | 0.0218345 | transferase activity, transferring phosphorus-containing groups | MF       |

**j) Salmon enrichment (230 genes)**

**Over-represented GO terms:**

| category   | num_in_subset | num_total | adj_pval  | term                  | ontology |
|------------|---------------|-----------|-----------|-----------------------|----------|
| GO:0003723 | 33            | 392       | 0.0020417 | RNA binding           | MF       |
| GO:0003676 | 45            | 674       | 0.0266022 | nucleic acid binding  | MF       |
| GO:0016070 | 31            | 423       | 0.0266022 | RNA metabolic process | BP       |

**k) Brown enrichment (547 genes)**

**Over-represented GO terms:**

| category   | num_in_subset | num_total | adj_pval  | term                                   | ontology |
|------------|---------------|-----------|-----------|----------------------------------------|----------|
| GO:0004016 | 10            | 43        | 0.0101522 | adenylate cyclase activity             | MF       |
| GO:0009975 | 10            | 43        | 0.0101522 | cyclase activity                       | MF       |
| GO:0009187 | 10            | 52        | 0.0271632 | cyclic nucleotide metabolic process    | BP       |
| GO:0009190 | 10            | 52        | 0.0271632 | cyclic nucleotide biosynthetic process | BP       |
| GO:0016849 | 10            | 53        | 0.0288921 | phosphorus-oxygen lyase activity       | MF       |

**l) Pink enrichment (383 genes)**

**Over-represented GO terms:**

| category   | num_in_subset | num_total | adj_pval  | term               | ontology |
|------------|---------------|-----------|-----------|--------------------|----------|
| GO:0070069 | 5             | 8         | 0.0475195 | cytochrome complex | CC       |

**m) Tan enrichment (243 genes)**

**Over-represented GO terms:**

| category   | num_in_subset | num_total | adj_pval  | term                     | ontology |
|------------|---------------|-----------|-----------|--------------------------|----------|
| GO:0000922 | 5             | 13        | 0.0485818 | spindle pole             | CC       |
| GO:0015630 | 25            | 344       | 0.0485818 | microtubule cytoskeleton | CC       |

**n) Red enrichment (460 genes)**

**Over-represented GO terms:**

| category   | num_in_subset | num_total | adj_pval  | term                                    | ontology |
|------------|---------------|-----------|-----------|-----------------------------------------|----------|
| GO:0005856 | 74            | 693       | 0.0113032 | cytoskeleton                            | CC       |
| GO:0006260 | 14            | 57        | 0.0284430 | DNA replication                         | BP       |
| GO:0005815 | 31            | 231       | 0.0492542 | microtubule organizing center           | CC       |
| GO:0005929 | 127           | 1558      | 0.0492542 | cilium                                  | CC       |
| GO:0042995 | 127           | 1558      | 0.0492542 | cell projection                         | CC       |
| GO:0051276 | 15            | 74        | 0.0492542 | chromosome organization                 | BP       |
| GO:0120025 | 127           | 1558      | 0.0492542 | plasma membrane bounded cell projection | CC       |

**Total enriched GO terms**

Total: 171 (Total  $-\log_{10}(\text{adj.pval}) = 540.546811$ )
