# Supplementary material for: Gene co-expression network analysis of Trypanosoma brucei in tsetse fly vector
Source: PubMed Central journal article supplement (PMC7821691; doi:10.1186/s13071-021-04597-6), 2021-01-22
Supplement: 13071_2021_4597_MOESM8_ESM.pdf [file 13071_2021_4597_MOESM8_ESM.pdf]

**Table S4: Module KEGG Enrichment**

**a) Lightyellow enrichment (129 genes)**

**Over-represented KEGG pathway:**

---

| category      | num_in_subset | num_total | adj_pval | name     |
|---------------|---------------|-----------|----------|----------|
| path:tbr03010 | 26            | 134       | 1e-07    | Ribosome |

---

**b) Lightcyan enrichment (193 genes)**

**Under-represented KEGG pathway:**

---

| category      | num_in_subset | num_total | adj_pval  | name               |
|---------------|---------------|-----------|-----------|--------------------|
| path:tbr01100 | 2             | 378       | 0.0078292 | Metabolic pathways |

---

**c) Magenta enrichment (264 genes)**

**Over-represented KEGG pathway:**

---

| category      | num_in_subset | num_total | adj_pval  | name              |
|---------------|---------------|-----------|-----------|-------------------|
| path:tbr00230 | 12            | 82        | 0.0088518 | Purine metabolism |

---

**d) Blue enrichment (614 genes)**

**Under-represented KEGG pathway:**

---

| category | num_in_subset | num_total | adj_pval | name |
|----------|---------------|-----------|----------|------|
|----------|---------------|-----------|----------|------|

---

---

|               |   |     |           |          |
|---------------|---|-----|-----------|----------|
| path:tbr03010 | 1 | 134 | 0.0143821 | Ribosome |
|---------------|---|-----|-----------|----------|

**e) Red enrichment (460 genes)**

**Over-represented KEGG pathway:**

---

| category      | num_in_subset | num_total | adj_pval  | name                     |
|---------------|---------------|-----------|-----------|--------------------------|
| path:tbr03440 | 6             | 14        | 0.0148137 | Homologous recombination |

**f) Yellow enrichment (539 genes)**

**Over-represented KEGG pathway:**

---

| category      | num_in_subset | num_total | adj_pval  | name        |
|---------------|---------------|-----------|-----------|-------------|
| path:tbr04144 | 8             | 35        | 0.0249234 | Endocytosis |

**g) Pink enrichment (383 genes)**

**Over-represented KEGG pathway:**

---

| category      | num_in_subset | num_total | adj_pval  | name          |
|---------------|---------------|-----------|-----------|---------------|
| path:tbr03013 | 8             | 42        | 0.0318986 | RNA transport |

**Total enriched KEGG pathway**

Total: 7 (Total  $-\log_{10}(\text{adj.pval}) = 17.970866$ )
